# Supplementary material for: GDSL lipases modulate immunity through lipid homeostasis in rice
Source: PubMed Central journal article supplement (PMC5703576; doi:10.1371/journal.ppat.1006724), 2017-11-13
Supplement: ppat.1006724.s004.pdf [file ppat.1006724.s004.pdf]

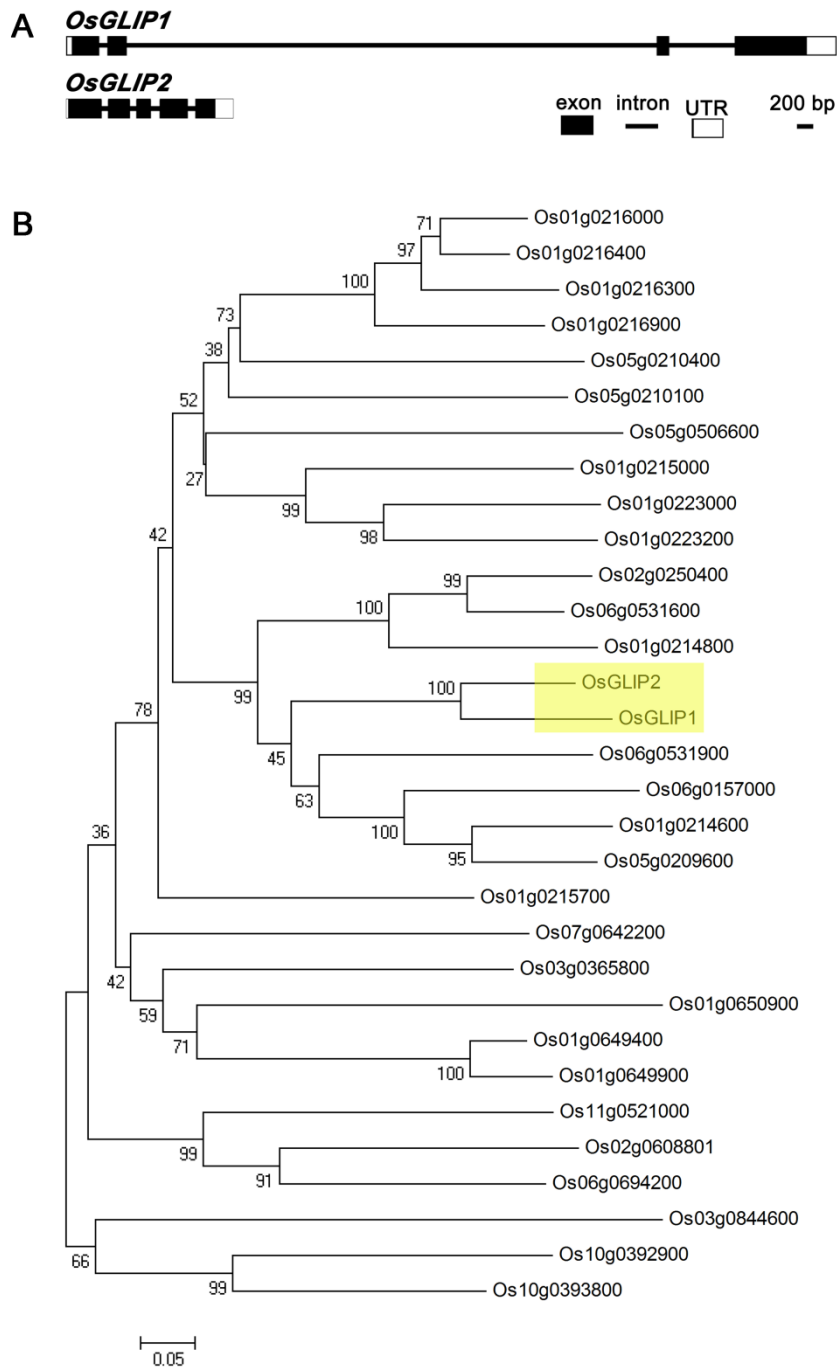

### S1 Fig. Phylogenetic analysis of rice GDSL lipases

(A) Gene structure of *OsGLIP1* and *OsGLIP2*. (B) A phylogenetic tree of GDSL lipases in rice. Protein sequences were aligned with CLUSTAL W, and the phylogenetic tree was constructed with MEGA4.
