# Supplementary material for: GDSL lipases modulate immunity through lipid homeostasis in rice
Source: PubMed Central journal article supplement (PMC5703576; doi:10.1371/journal.ppat.1006724), 2017-11-13
Supplement: ppat.1006724.s008.pdf [file ppat.1006724.s008.pdf]

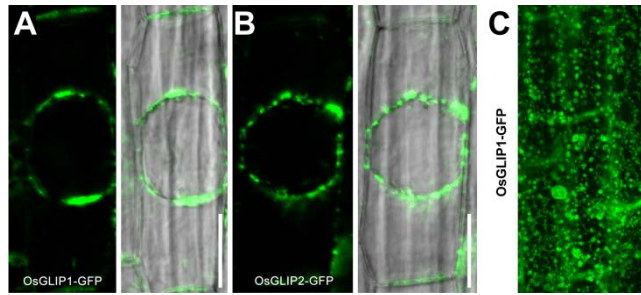

**S5 Fig. Plasmolysis analysis of *OsGLIP1-GFP* and *OsGLIP2-GFP* transgenic plants cells**

The root tips of transgenic plants were incubated in 25% sucrose to induce cell plasmolysis and then observed under confocal microscopy. (A, B) Confocal images of *OsGLIP1-GFP* (A) and *OsGLIP2-GFP* (B) after cell plasmolysis. Scale bars = 20  $\mu\text{m}$ . (C) *OsGLIP1-GFP* root cells without plasmolysis to show the endomembrane systems that link *OsGLIP1-GFP* labelled vesicles. Scale bar = 20  $\mu\text{m}$ .
