# Supplementary material for: GDSL lipases modulate immunity through lipid homeostasis in rice
Source: PubMed Central journal article supplement (PMC5703576; doi:10.1371/journal.ppat.1006724), 2017-11-13
Supplement: ppat.1006724.s009.pdf [file ppat.1006724.s009.pdf]

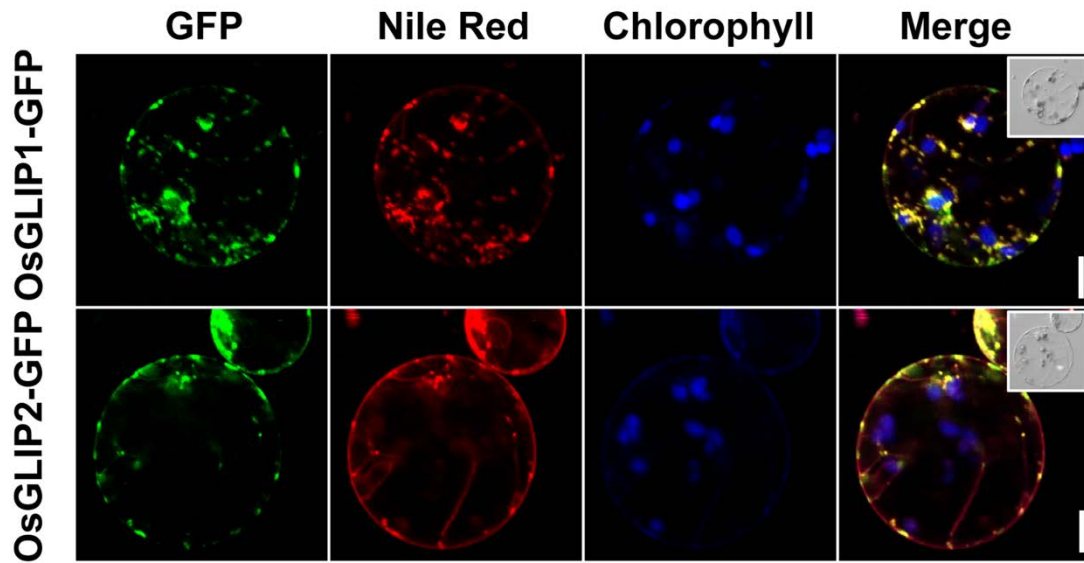

**S6 Fig. Co-localization of OsGLIP1 and OsGLIP2 with Nile Red in rice protoplasts**  
 Protoplasts were generated from seedlings of transgenic plants expressing OsGLIP1-GFP and OsGLIP2-GFP fusion protein. Note the overlapping of GFP green signals and Nile Red stained red signals, while OsGLIP1-GFP and OsGLIP2-GFP were not associated with chloroplasts. Scale bars = 10  $\mu$ m.
