# Supplementary material for: GDSL lipases modulate immunity through lipid homeostasis in rice
Source: PLOS journal article supplement (doi:10.1371/journal.ppat.1006724), 2017-11-13
Supplement: S5 (10.1371/journal.ppat.1006724.s005) [file journal.ppat.1006724.s005]

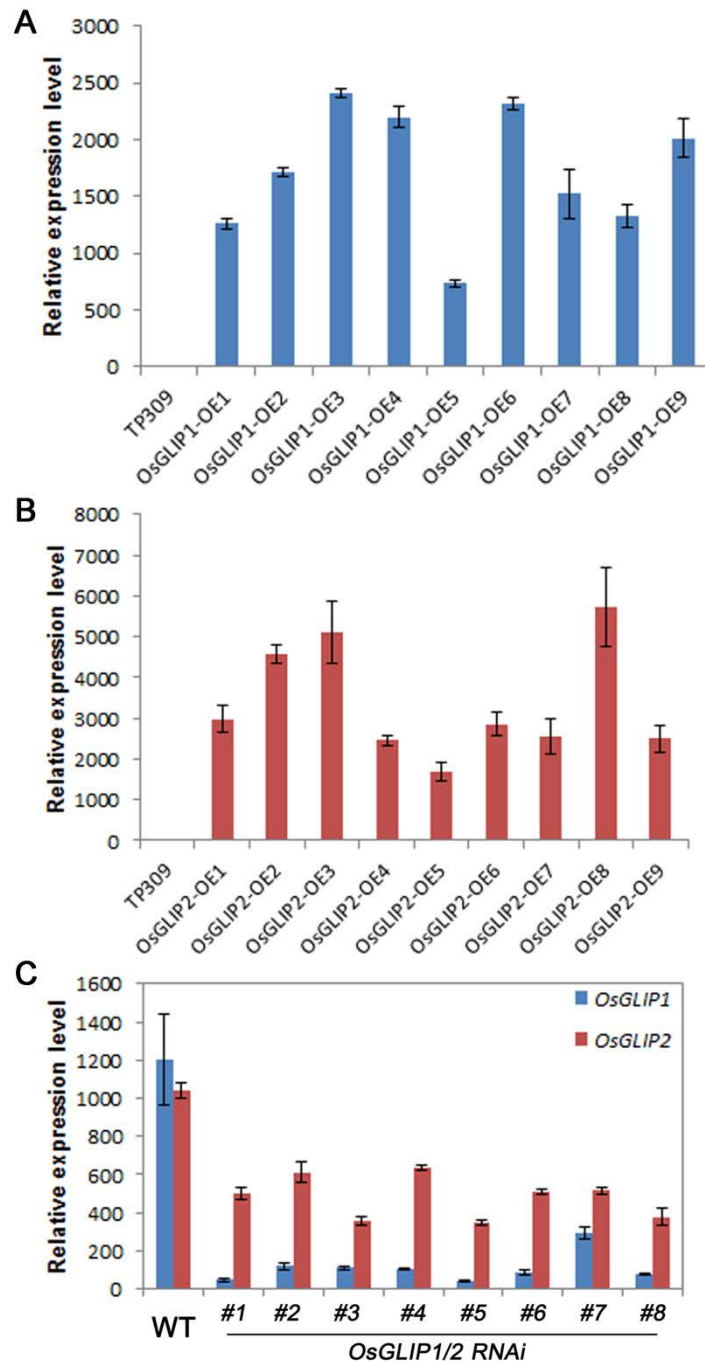

**S2 Fig. Relative expression levels of *OsGLIP1* and *OsGLIP2* in overexpression and RNAi plants**

The expression of *OsGLIP1* and *OsGLIP2* in 9 independent *OsGLIP1-OE* (A) and *OsGLIP2-OE* (B) lines and 8 independent *OsGLIP1/2-RNAi* lines (C) was compared to the wild-type control with normalization to rice Actin1 gene. Error bars,  $\pm$  SD (n = 3).
