# Supplementary material for: GDSL lipases modulate immunity through lipid homeostasis in rice
Source: PLOS journal article supplement (doi:10.1371/journal.ppat.1006724), 2017-11-13
Supplement: S6 (10.1371/journal.ppat.1006724.s006) [file journal.ppat.1006724.s006]

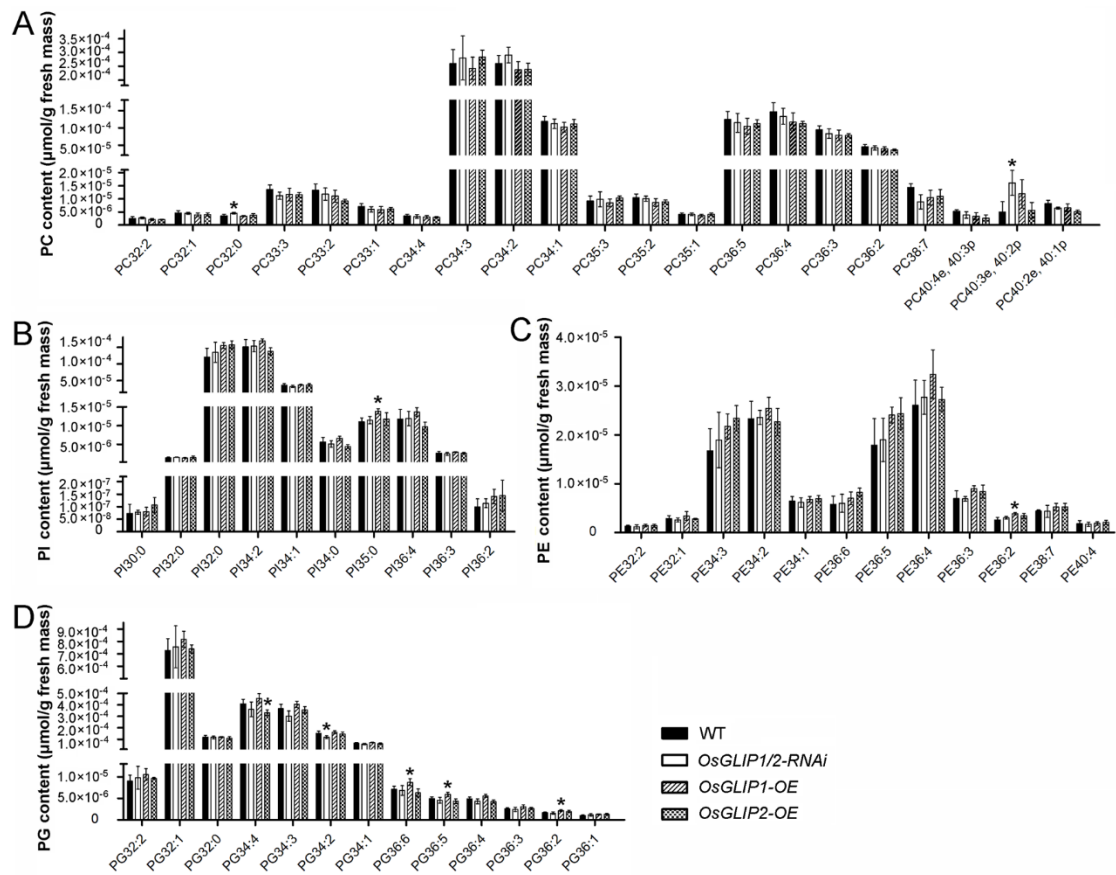

### S3 Fig. Profiling of individual molecular species of lipids

Lipids, PC (A), PI (B), PE (C) and PG (D), are presented as the number of carbon atoms: total double bonds in the fatty acyl groups. Data are shown as means  $\pm$  SD ( $n = 5$ ) of mixed leaf samples from three representative transgenic lines. \* $P < 0.05$  or \*\* $P < 0.01$ , by Student's  $t$ -test and Bonferroni correction for multiple (three comparisons) tests.
